# Supplementary material
Source: PubMed Central journal article supplement (PMC6021130)
Supplement: NIHMS974774-supplement-Supplemental_Material.pdf [file NIHMS974774-supplement-Supplemental_Material.pdf]

## Average Normalized Read Counts

| miRNA           | Average Normalized Read Counts |        | Fold Change | AUC  | P-values |
|-----------------|--------------------------------|--------|-------------|------|----------|
|                 | Blood                          | Tissue |             |      |          |
| hsa-miR-451a    | 416628                         | 4417   | 94.320      | 1.00 | 1.69E-73 |
| hsa-let-7f-5p   | 70837                          | 25482  | 2.780       | 0.99 | 6.56E-38 |
| hsa-let-7i-5p   | 58087                          | 23350  | 2.488       | 0.95 | 3.49E-08 |
| hsa-miR-486-5p  | 52729                          | 546    | 96.588      | 1.00 | 2.73E-91 |
| hsa-let-7g-5p   | 40318                          | 13431  | 3.002       | 0.99 | 9.58E-38 |
| hsa-miR-101-3p  | 39580                          | 2654   | 14.913      | 1.00 | 1.12E-66 |
| hsa-miR-21-5p   | 30018                          | 252373 | 0.119       | 0.00 | 2.73E-05 |
| hsa-miR-92a-3p  | 26423                          | 8271   | 3.195       | 0.98 | 1.04E-29 |
| hsa-let-7a-5p   | 23813                          | 8845   | 2.692       | 0.97 | 5.01E-24 |
| hsa-miR-144-3p  | 20435                          | 47     | 438.967     | 1.00 | 2.40E-66 |
| hsa-miR-16-5p   | 11786                          | 1265   | 9.316       | 1.00 | 2.77E-73 |
| hsa-miR-140-3p  | 11479                          | 2330   | 4.927       | 1.00 | 1.64E-46 |
| hsa-let-7b-5p   | 10759                          | 6369   | 1.689       | 0.88 | 2.51E-07 |
| hsa-miR-20a-5p  | 10127                          | 3402   | 2.977       | 0.96 | 3.40E-20 |
| hsa-miR-103a-3p | 9488                           | 3452   | 2.749       | 0.99 | 1.11E-33 |
| hsa-miR-25-3p   | 9237                           | 1391   | 6.640       | 1.00 | 3.84E-43 |
| hsa-miR-185-5p  | 8994                           | 575    | 15.641      | 1.00 | 1.25E-56 |
| hsa-miR-126-3p  | 8697                           | 6887   | 1.263       | 0.77 | 4.20E-02 |
| hsa-miR-26a-5p  | 8530                           | 29777  | 0.286       | 0.02 | 6.29E-09 |
| hsa-miR-30d-5p  | 8150                           | 11284  | 0.722       | 0.21 | 7.09E-05 |
| hsa-miR-30e-5p  | 7649                           | 2478   | 3.086       | 1.00 | 3.86E-39 |
| hsa-miR-22-3p   | 7141                           | 8901   | 0.802       | 0.48 | 2.86E-01 |
| hsa-miR-144-5p  | 6580                           | 38     | 171.241     | 1.00 | 3.81E-69 |
| hsa-miR-182-5p  | 4874                           | 1671   | 2.917       | 0.92 | 1.47E-14 |
| hsa-miR-148a-3p | 4384                           | 23780  | 0.184       | 0.00 | 1.29E-08 |
| hsa-miR-223-3p  | 4362                           | 785    | 5.556       | 0.95 | 2.11E-14 |
| hsa-miR-93-5p   | 4261                           | 1176   | 3.624       | 1.00 | 1.19E-39 |
| hsa-miR-142-5p  | 4160                           | 315    | 13.189      | 1.00 | 5.18E-50 |
| hsa-miR-191-5p  | 3917                           | 2741   | 1.429       | 0.70 | 2.46E-05 |
| hsa-miR-363-3p  | 3911                           | 97     | 40.172      | 1.00 | 2.13E-71 |
| hsa-miR-7-5p    | 3821                           | 7655   | 0.499       | 0.33 | 1.04E-02 |
| hsa-miR-26b-5p  | 2783                           | 4837   | 0.575       | 0.18 | 2.09E-05 |
| hsa-miR-106b-3p | 2748                           | 493    | 5.571       | 1.00 | 2.42E-64 |
| hsa-miR-19b-3p  | 2710                           | 506    | 5.353       | 1.00 | 8.74E-34 |
| hsa-let-7d-5p   | 2619                           | 604    | 4.339       | 1.00 | 7.22E-43 |
| hsa-miR-148b-3p | 2321                           | 954    | 2.433       | 0.97 | 7.68E-23 |
| hsa-miR-320a    | 2287                           | 3288   | 0.696       | 0.51 | 1.41E-01 |
| hsa-miR-186-5p  | 2254                           | 1049   | 2.149       | 0.98 | 8.02E-32 |
| hsa-miR-17-5p   | 2183                           | 777    | 2.809       | 0.95 | 4.71E-19 |
| hsa-miR-183-5p  | 2138                           | 746    | 2.866       | 0.94 | 2.05E-17 |
| hsa-miR-192-5p  | 2097                           | 68919  | 0.030       | 0.04 | 7.03E-14 |
| hsa-miR-652-3p  | 2069                           | 559    | 3.703       | 0.99 | 5.11E-35 |
| hsa-miR-106b-5p | 1987                           | 389    | 5.104       | 1.00 | 7.22E-49 |
| hsa-miR-146b-5p | 1651                           | 11276  | 0.146       | 0.01 | 3.49E-03 |
| hsa-miR-181a-5p | 1353                           | 2183   | 0.620       | 0.20 | 5.79E-04 |
| hsa-miR-378a-3p | 1303                           | 13331  | 0.098       | 0.00 | 5.52E-09 |
| hsa-miR-98-5p   | 1249                           | 634    | 1.972       | 0.89 | 4.16E-09 |
| hsa-miR-532-5p  | 1192                           | 1499   | 0.796       | 0.40 | 8.76E-02 |
| hsa-miR-340-5p  | 1167                           | 533    | 2.189       | 0.97 | 1.89E-19 |
| hsa-miR-30c-5p  | 1121                           | 1714   | 0.654       | 0.21 | 9.39E-06 |
| hsa-miR-423-5p  | 1104                           | 598    | 1.847       | 0.82 | 6.15E-08 |
| hsa-miR-151a-3p | 1100                           | 2143   | 0.513       | 0.02 | 3.42E-14 |
| hsa-miR-15b-5p  | 1057                           | 79     | 13.410      | 1.00 | 1.79E-40 |

|                 |      |        |        |      |          |
|-----------------|------|--------|--------|------|----------|
| hsa-miR-425-5p  | 1054 | 719    | 1.467  | 0.78 | 3.58E-06 |
| hsa-miR-30b-5p  | 953  | 2964   | 0.321  | 0.03 | 2.79E-16 |
| hsa-miR-32-5p   | 949  | 59     | 16.194 | 1.00 | 3.99E-59 |
| hsa-miR-143-3p  | 944  | 149334 | 0.006  | 0.00 | 1.55E-06 |
| hsa-miR-24-3p   | 931  | 5748   | 0.162  | 0.00 | 1.17E-22 |
| hsa-miR-146a-5p | 931  | 8046   | 0.116  | 0.04 | 1.82E-06 |
| hsa-miR-374b-5p | 896  | 691    | 1.298  | 0.65 | 2.29E-03 |
| hsa-miR-20b-5p  | 885  | 27     | 32.189 | 1.00 | 3.75E-79 |
| hsa-miR-23a-3p  | 860  | 3584   | 0.240  | 0.00 | 3.82E-17 |
| hsa-miR-150-5p  | 833  | 1776   | 0.469  | 0.37 | 3.86E-02 |
| hsa-miR-142-3p  | 773  | 216    | 3.572  | 0.88 | 5.27E-18 |
| hsa-miR-423-3p  | 766  | 1867   | 0.410  | 0.02 | 5.91E-14 |
| hsa-miR-27a-3p  | 750  | 5265   | 0.143  | 0.00 | 7.91E-22 |
| hsa-miR-16-2-3p | 737  | 85     | 8.687  | 1.00 | 1.43E-36 |
| hsa-miR-27b-3p  | 665  | 15735  | 0.042  | 0.00 | 6.48E-28 |
| hsa-miR-15a-5p  | 571  | 66     | 8.611  | 1.00 | 7.97E-77 |
| hsa-miR-107     | 571  | 150    | 3.808  | 1.00 | 9.01E-41 |
| hsa-miR-194-5p  | 529  | 9542   | 0.055  | 0.04 | 1.47E-12 |
| hsa-miR-484     | 493  | 165    | 2.990  | 0.97 | 5.35E-24 |
| hsa-miR-19a-3p  | 490  | 100    | 4.894  | 0.99 | 1.67E-42 |
| hsa-miR-106a-5p | 475  | 24     | 19.660 | 1.00 | 3.52E-50 |
| hsa-miR-221-3p  | 474  | 2531   | 0.187  | 0.00 | 2.16E-13 |
| hsa-miR-126-5p  | 439  | 217    | 2.019  | 0.92 | 5.86E-14 |
| hsa-miR-29a-3p  | 433  | 3617   | 0.120  | 0.00 | 3.68E-22 |
| hsa-miR-629-5p  | 420  | 213    | 1.967  | 0.95 | 2.04E-17 |
| hsa-miR-660-5p  | 402  | 321    | 1.253  | 0.78 | 5.58E-02 |
| hsa-miR-96-5p   | 397  | 132    | 3.019  | 0.94 | 2.66E-16 |
| hsa-miR-15b-3p  | 376  | 53     | 7.080  | 1.00 | 7.96E-52 |
| hsa-miR-30e-3p  | 335  | 237    | 1.413  | 0.79 | 1.41E-06 |
| hsa-miR-29b-3p  | 317  | 379    | 0.835  | 0.39 | 5.18E-02 |
| hsa-miR-100-5p  | 301  | 12756  | 0.024  | 0.01 | 1.13E-02 |
| hsa-miR-584-5p  | 298  | 86     | 3.469  | 0.98 | 1.85E-27 |
| hsa-miR-361-3p  | 263  | 947    | 0.278  | 0.00 | 1.93E-17 |
| hsa-let-7c      | 220  | 679    | 0.323  | 0.31 | 8.25E-03 |
| hsa-miR-18a-5p  | 215  | 55     | 3.885  | 0.97 | 1.44E-24 |
| hsa-miR-454-3p  | 215  | 68     | 3.158  | 0.92 | 4.49E-27 |
| hsa-miR-199a-3p | 191  | 5707   | 0.033  | 0.00 | 1.51E-05 |
| hsa-miR-941     | 168  | 70     | 2.399  | 0.94 | 1.32E-16 |
| hsa-miR-29c-3p  | 167  | 179    | 0.932  | 0.51 | 5.37E-01 |
| hsa-miR-3615    | 166  | 65     | 2.554  | 0.82 | 5.56E-11 |
| hsa-miR-374a-3p | 162  | 41     | 3.967  | 0.97 | 2.09E-29 |
| hsa-miR-3613-5p | 162  | 173    | 0.934  | 0.60 | 6.71E-01 |
| hsa-miR-140-5p  | 161  | 148    | 1.087  | 0.58 | 4.54E-01 |
| hsa-miR-128     | 154  | 312    | 0.494  | 0.17 | 1.74E-06 |
| hsa-miR-3158-3p | 149  | 13     | 11.441 | 1.00 | 1.71E-34 |
| hsa-miR-502-3p  | 148  | 137    | 1.081  | 0.63 | 3.77E-01 |
| hsa-miR-151a-5p | 145  | 395    | 0.367  | 0.02 | 3.62E-16 |
| hsa-miR-1307-3p | 142  | 870    | 0.163  | 0.00 | 5.16E-10 |
| hsa-miR-10a-5p  | 136  | 55193  | 0.002  | 0.00 | 1.03E-15 |
| hsa-miR-374a-5p | 136  | 97     | 1.399  | 0.65 | 7.08E-03 |
| hsa-miR-500a-3p | 135  | 179    | 0.754  | 0.29 | 3.96E-03 |
| hsa-miR-23b-3p  | 135  | 2132   | 0.063  | 0.00 | 2.07E-14 |
| hsa-miR-342-3p  | 134  | 416    | 0.323  | 0.10 | 6.80E-07 |
| hsa-miR-576-3p  | 129  | 49     | 2.619  | 0.94 | 1.73E-13 |
| hsa-miR-130a-3p | 121  | 37     | 3.242  | 0.98 | 2.09E-30 |

|                   |     |      |        |      |          |
|-------------------|-----|------|--------|------|----------|
| hsa-miR-1180      | 121 | 132  | 0.916  | 0.56 | 6.03E-01 |
| hsa-miR-222-3p    | 120 | 1198 | 0.100  | 0.00 | 1.26E-12 |
| hsa-miR-324-5p    | 117 | 61   | 1.927  | 0.89 | 1.61E-12 |
| hsa-let-7d-3p     | 113 | 189  | 0.595  | 0.09 | 2.22E-09 |
| hsa-miR-223-5p    | 107 | 30   | 3.540  | 0.95 | 6.46E-15 |
| hsa-miR-99a-5p    | 106 | 8311 | 0.013  | 0.01 | 3.31E-03 |
| hsa-miR-425-3p    | 106 | 131  | 0.805  | 0.42 | 6.94E-02 |
| hsa-miR-199b-3p   | 95  | 2787 | 0.034  | 0.00 | 2.24E-06 |
| hsa-miR-339-5p    | 95  | 288  | 0.331  | 0.00 | 7.83E-12 |
| hsa-miR-362-5p    | 93  | 170  | 0.546  | 0.22 | 2.36E-03 |
| hsa-miR-199a-5p   | 92  | 1710 | 0.054  | 0.00 | 8.24E-05 |
| hsa-miR-501-3p    | 88  | 59   | 1.498  | 0.81 | 4.11E-05 |
| hsa-miR-181b-5p   | 86  | 522  | 0.165  | 0.00 | 1.05E-15 |
| hsa-miR-197-3p    | 86  | 372  | 0.231  | 0.00 | 8.51E-18 |
| hsa-miR-199b-5p   | 78  | 2674 | 0.029  | 0.00 | 1.06E-04 |
| hsa-miR-30a-5p    | 76  | 4833 | 0.016  | 0.00 | 4.51E-15 |
| hsa-miR-155-5p    | 75  | 1032 | 0.073  | 0.00 | 3.72E-09 |
| hsa-miR-576-5p    | 72  | 22   | 3.292  | 0.95 | 1.08E-20 |
| hsa-miR-28-3p     | 71  | 1058 | 0.067  | 0.00 | 3.82E-29 |
| hsa-miR-185-3p    | 71  | 18   | 3.888  | 0.98 | 6.39E-31 |
| hsa-miR-181a-2-3p | 70  | 95   | 0.745  | 0.33 | 7.13E-03 |
| hsa-miR-1         | 70  | 2679 | 0.026  | 0.01 | 8.92E-03 |
| hsa-miR-148b-5p   | 68  | 27   | 2.478  | 0.98 | 6.27E-27 |
| hsa-miR-378c      | 67  | 404  | 0.167  | 0.02 | 1.22E-07 |
| hsa-miR-152       | 67  | 663  | 0.101  | 0.00 | 1.18E-06 |
| hsa-miR-210       | 63  | 246  | 0.257  | 0.09 | 1.60E-04 |
| hsa-miR-22-5p     | 61  | 92   | 0.665  | 0.32 | 5.11E-03 |
| hsa-miR-548f      | 58  | 4    | 13.651 | 1.00 | 5.37E-68 |
| hsa-miR-92b-3p    | 58  | 174  | 0.331  | 0.04 | 2.04E-09 |
| hsa-miR-744-5p    | 57  | 73   | 0.778  | 0.30 | 8.95E-03 |
| hsa-miR-574-5p    | 55  | 653  | 0.084  | 0.00 | 1.58E-06 |
| hsa-miR-320b      | 53  | 97   | 0.547  | 0.34 | 1.73E-02 |
| hsa-miR-190a      | 53  | 94   | 0.559  | 0.38 | 2.67E-02 |
| hsa-miR-424-5p    | 52  | 34   | 1.563  | 0.75 | 2.24E-03 |
| hsa-miR-651       | 52  | 42   | 1.225  | 0.71 | 2.13E-01 |
| hsa-miR-625-3p    | 52  | 144  | 0.359  | 0.10 | 6.17E-06 |
| hsa-miR-503-5p    | 51  | 18   | 2.916  | 0.90 | 2.89E-13 |
| hsa-miR-421       | 51  | 45   | 1.142  | 0.65 | 9.68E-02 |
| hsa-miR-196b-5p   | 51  | 531  | 0.095  | 0.01 | 1.58E-09 |
| hsa-let-7a-3p     | 50  | 59   | 0.848  | 0.40 | 1.16E-01 |
| hsa-miR-324-3p    | 50  | 40   | 1.255  | 0.72 | 2.67E-02 |
| hsa-miR-345-5p    | 49  | 102  | 0.481  | 0.07 | 1.79E-09 |
| hsa-miR-361-5p    | 49  | 144  | 0.341  | 0.01 | 1.44E-14 |
| hsa-miR-589-5p    | 47  | 27   | 1.759  | 0.95 | 1.72E-17 |
| hsa-miR-942       | 45  | 31   | 1.477  | 0.77 | 4.27E-04 |
| hsa-miR-21-3p     | 45  | 294  | 0.153  | 0.01 | 2.99E-09 |
| hsa-miR-550a-3p   | 43  | 6    | 7.356  | 0.99 | 1.44E-34 |
| hsa-miR-769-5p    | 42  | 340  | 0.123  | 0.00 | 1.17E-08 |
| hsa-miR-379-5p    | 41  | 309  | 0.132  | 0.02 | 7.66E-07 |
| hsa-miR-17-3p     | 40  | 24   | 1.638  | 0.83 | 4.07E-05 |
| hsa-miR-582-3p    | 40  | 52   | 0.762  | 0.37 | 1.17E-01 |
| hsa-miR-664a-3p   | 40  | 82   | 0.487  | 0.19 | 5.14E-05 |
| hsa-miR-4732-5p   | 40  | 1    | 46.578 | 1.00 | 4.87E-66 |
| hsa-miR-370       | 40  | 285  | 0.139  | 0.05 | 8.29E-04 |
| hsa-miR-99b-5p    | 39  | 1418 | 0.028  | 0.00 | 2.62E-11 |

|                   |    |       |        |      |          |
|-------------------|----|-------|--------|------|----------|
| hsa-miR-1260b     | 38 | 265   | 0.145  | 0.02 | 2.01E-09 |
| hsa-miR-550a-3-5p | 38 | 8     | 4.610  | 0.99 | 2.97E-37 |
| hsa-miR-331-3p    | 38 | 75    | 0.511  | 0.19 | 1.06E-07 |
| hsa-miR-29c-5p    | 38 | 150   | 0.251  | 0.01 | 7.13E-13 |
| hsa-miR-1278      | 38 | 7     | 5.471  | 1.00 | 2.69E-40 |
| hsa-let-7e-5p     | 37 | 461   | 0.081  | 0.00 | 1.43E-09 |
| hsa-miR-3688-3p   | 37 | 2     | 18.696 | 1.00 | 4.76E-77 |
| hsa-miR-548e      | 35 | 16    | 2.185  | 0.98 | 3.54E-21 |
| hsa-miR-339-3p    | 35 | 56    | 0.636  | 0.17 | 1.10E-06 |
| hsa-miR-340-3p    | 34 | 36    | 0.956  | 0.47 | 7.65E-01 |
| hsa-miR-624-5p    | 34 | 2     | 15.192 | 1.00 | 3.15E-63 |
| hsa-miR-28-5p     | 33 | 372   | 0.089  | 0.00 | 7.23E-19 |
| hsa-miR-342-5p    | 33 | 31    | 1.055  | 0.59 | 7.54E-01 |
| hsa-miR-590-3p    | 33 | 19    | 1.727  | 0.82 | 5.35E-07 |
| hsa-miR-18a-3p    | 32 | 15    | 2.146  | 0.89 | 5.59E-11 |
| hsa-miR-2110      | 32 | 493   | 0.065  | 0.55 | 6.06E-01 |
| hsa-miR-381-3p    | 32 | 246   | 0.130  | 0.02 | 4.06E-09 |
| hsa-miR-1285-3p   | 31 | 9     | 3.401  | 0.98 | 9.94E-29 |
| hsa-miR-1260a     | 31 | 333   | 0.092  | 0.02 | 7.01E-02 |
| hsa-miR-532-3p    | 31 | 46    | 0.670  | 0.30 | 7.98E-03 |
| hsa-miR-335-5p    | 30 | 40    | 0.761  | 0.46 | 1.33E-01 |
| hsa-miR-221-5p    | 30 | 142   | 0.209  | 0.00 | 2.62E-17 |
| hsa-miR-1307-5p   | 30 | 93    | 0.317  | 0.12 | 2.83E-04 |
| hsa-miR-598       | 29 | 18    | 1.675  | 0.83 | 6.36E-07 |
| hsa-miR-550a-5p   | 29 | 7     | 4.211  | 0.99 | 1.50E-33 |
| hsa-miR-200c-3p   | 28 | 11539 | 0.002  | 0.01 | 1.06E-14 |
| hsa-let-7i-3p     | 27 | 31    | 0.864  | 0.50 | 1.98E-01 |
| hsa-miR-218-5p    | 27 | 396   | 0.067  | 0.04 | 4.39E-08 |
| hsa-miR-450b-5p   | 26 | 37    | 0.723  | 0.39 | 4.89E-02 |
| hsa-miR-130b-3p   | 26 | 15    | 1.741  | 0.87 | 2.05E-09 |
| hsa-miR-4504      | 26 | 1     | 19.348 | 1.00 | 7.91E-69 |
| hsa-miR-3200-3p   | 25 | 5     | 4.628  | 0.99 | 6.40E-35 |
| hsa-miR-93-3p     | 23 | 19    | 1.165  | 0.61 | 2.30E-01 |
| hsa-miR-145-5p    | 23 | 10060 | 0.002  | 0.00 | 1.07E-04 |
| hsa-miR-125b-5p   | 23 | 1666  | 0.014  | 0.00 | 1.64E-04 |
| hsa-miR-125a-5p   | 22 | 1996  | 0.011  | 0.00 | 1.51E-10 |
| hsa-miR-548o-3p   | 22 | 14    | 1.579  | 0.75 | 3.28E-05 |
| hsa-miR-424-3p    | 21 | 11    | 1.957  | 0.82 | 1.59E-05 |
| hsa-miR-101-5p    | 21 | 2     | 9.384  | 1.00 | 3.79E-42 |
| hsa-miR-450a-5p   | 21 | 31    | 0.659  | 0.35 | 1.71E-02 |
| hsa-miR-4326      | 20 | 38    | 0.521  | 0.28 | 2.87E-03 |
| hsa-miR-362-3p    | 19 | 11    | 1.736  | 0.71 | 2.31E-04 |
| hsa-miR-200b-3p   | 19 | 34828 | 0.001  | 0.00 | 1.62E-15 |
| hsa-miR-542-3p    | 19 | 22    | 0.854  | 0.52 | 4.12E-01 |
| hsa-miR-582-5p    | 19 | 32    | 0.589  | 0.27 | 2.89E-03 |
| hsa-miR-378d      | 19 | 180   | 0.104  | 0.01 | 3.26E-07 |
| hsa-miR-505-3p    | 19 | 66    | 0.285  | 0.00 | 1.12E-22 |
| hsa-miR-215       | 19 | 7517  | 0.002  | 0.02 | 2.49E-03 |
| hsa-miR-3912      | 19 | 4     | 5.024  | 1.00 | 6.46E-44 |
| hsa-miR-5010-3p   | 18 | 10    | 1.838  | 0.78 | 2.37E-05 |
| hsa-miR-548d-5p   | 18 | 3     | 5.226  | 1.00 | 9.79E-42 |
| hsa-miR-29b-2-5p  | 18 | 12    | 1.469  | 0.70 | 1.08E-03 |
| hsa-miR-548k      | 18 | 12    | 1.468  | 0.75 | 1.15E-03 |
| hsa-miR-326       | 18 | 34    | 0.522  | 0.16 | 4.08E-06 |
| hsa-miR-574-3p    | 18 | 418   | 0.042  | 0.00 | 1.08E-16 |

|                   |    |       |        |      |          |
|-------------------|----|-------|--------|------|----------|
| hsa-miR-151b      | 17 | 26    | 0.669  | 0.22 | 8.91E-06 |
| hsa-miR-127-3p    | 17 | 1206  | 0.014  | 0.00 | 3.19E-03 |
| hsa-miR-378i      | 17 | 311   | 0.055  | 0.00 | 1.34E-10 |
| hsa-miR-664a-5p   | 17 | 24    | 0.721  | 0.36 | 2.24E-02 |
| hsa-miR-139-5p    | 16 | 163   | 0.098  | 0.03 | 1.54E-04 |
| hsa-miR-766-3p    | 16 | 13    | 1.264  | 0.56 | 1.31E-01 |
| hsa-miR-654-3p    | 15 | 69    | 0.221  | 0.08 | 1.37E-06 |
| hsa-miR-328       | 15 | 74    | 0.203  | 0.02 | 2.06E-09 |
| hsa-miR-18b-5p    | 15 | 1     | 11.272 | 1.00 | 5.56E-59 |
| hsa-miR-181a-3p   | 14 | 48    | 0.297  | 0.04 | 1.98E-08 |
| hsa-miR-409-3p    | 14 | 195   | 0.073  | 0.00 | 1.08E-05 |
| hsa-miR-378a-5p   | 14 | 174   | 0.082  | 0.00 | 5.37E-11 |
| hsa-miR-1277-5p   | 13 | 3     | 4.748  | 0.99 | 1.36E-27 |
| hsa-miR-4732-3p   | 13 | 1     | 17.532 | 1.00 | 7.35E-29 |
| hsa-miR-3913-5p   | 13 | 7     | 1.908  | 0.87 | 7.40E-09 |
| hsa-miR-148a-5p   | 12 | 315   | 0.040  | 0.00 | 2.11E-13 |
| hsa-miR-1301      | 12 | 20    | 0.603  | 0.18 | 8.77E-05 |
| hsa-miR-1255b-5p  | 12 | 1     | 8.377  | 1.00 | 3.83E-54 |
| hsa-miR-1255a     | 12 | 6     | 2.043  | 0.79 | 2.33E-06 |
| hsa-miR-1294      | 12 | 3     | 4.432  | 0.96 | 2.89E-22 |
| hsa-miR-135a-5p   | 12 | 11    | 1.054  | 0.63 | 7.89E-01 |
| hsa-miR-499a-5p   | 11 | 22    | 0.512  | 0.35 | 1.33E-01 |
| hsa-let-7b-3p     | 11 | 32    | 0.338  | 0.06 | 9.15E-09 |
| hsa-miR-4508      | 11 | 3     | 4.210  | 0.92 | 2.50E-13 |
| hsa-miR-134       | 11 | 83    | 0.132  | 0.02 | 3.59E-05 |
| hsa-miR-548ay-5p  | 11 | 2     | 5.400  | 1.00 | 1.66E-46 |
| hsa-miR-9-5p      | 11 | 158   | 0.069  | 0.01 | 9.63E-06 |
| hsa-miR-330-5p    | 11 | 25    | 0.425  | 0.09 | 7.91E-09 |
| hsa-miR-24-2-5p   | 10 | 78    | 0.135  | 0.00 | 6.27E-24 |
| hsa-miR-132-3p    | 10 | 91    | 0.115  | 0.00 | 7.39E-16 |
| hsa-miR-335-3p    | 10 | 251   | 0.040  | 0.00 | 1.09E-08 |
| hsa-miR-454-5p    | 10 | 3     | 2.967  | 0.88 | 4.02E-15 |
| hsa-miR-5695      | 10 | 1     | 11.070 | 1.00 | 2.93E-50 |
| hsa-miR-4286      | 10 | 80    | 0.123  | 0.00 | 7.88E-16 |
| hsa-miR-3200-5p   | 10 | 2     | 6.404  | 0.99 | 6.71E-17 |
| hsa-miR-338-5p    | 9  | 51    | 0.186  | 0.08 | 1.69E-05 |
| hsa-miR-3656      | 9  | 13    | 0.676  | 0.49 | 2.70E-01 |
| hsa-miR-378g      | 9  | 71    | 0.129  | 0.01 | 6.17E-08 |
| hsa-let-7g-3p     | 9  | 7     | 1.255  | 0.56 | 1.25E-01 |
| hsa-miR-130b-5p   | 9  | 38    | 0.236  | 0.05 | 1.47E-11 |
| hsa-miR-10b-5p    | 9  | 18224 | 0.000  | 0.00 | 1.25E-15 |
| hsa-let-7f-2-3p   | 9  | 14    | 0.642  | 0.32 | 1.03E-02 |
| hsa-miR-103a-2-5p | 9  | 4     | 2.199  | 0.85 | 1.23E-10 |
| hsa-miR-4685-3p   | 9  | 3     | 3.329  | 0.89 | 1.37E-13 |
| hsa-miR-146b-3p   | 9  | 101   | 0.086  | 0.00 | 2.05E-07 |
| hsa-miR-432-5p    | 9  | 34    | 0.256  | 0.08 | 1.46E-06 |
| hsa-miR-382-5p    | 8  | 106   | 0.080  | 0.01 | 4.70E-05 |
| hsa-miR-5582-3p   | 8  | 1     | 6.918  | 0.98 | 3.16E-19 |
| hsa-miR-495-3p    | 8  | 49    | 0.171  | 0.03 | 1.32E-10 |
| hsa-miR-3143      | 8  | 1     | 9.919  | 1.00 | 7.18E-38 |
| hsa-miR-136-3p    | 8  | 47    | 0.175  | 0.05 | 2.26E-11 |
| hsa-miR-493-3p    | 8  | 81    | 0.100  | 0.01 | 3.71E-05 |
| hsa-miR-501-5p    | 8  | 32    | 0.247  | 0.07 | 1.12E-05 |
| hsa-miR-6513-5p   | 8  | 2     | 4.652  | 0.94 | 7.48E-21 |
| hsa-miR-1246      | 8  | 247   | 0.032  | 0.03 | 1.71E-02 |

|                 |   |       |       |      |          |
|-----------------|---|-------|-------|------|----------|
| hsa-miR-4473    | 8 | 13    | 0.582 | 0.34 | 9.07E-03 |
| hsa-miR-1304-5p | 8 | 2     | 3.253 | 0.96 | 8.91E-18 |
| hsa-miR-641     | 8 | 5     | 1.395 | 0.75 | 3.81E-02 |
| hsa-miR-181c-5p | 8 | 46    | 0.165 | 0.02 | 1.70E-13 |
| hsa-miR-26b-3p  | 7 | 16    | 0.468 | 0.12 | 1.57E-08 |
| hsa-miR-331-5p  | 7 | 6     | 1.171 | 0.65 | 2.34E-01 |
| hsa-miR-369-3p  | 7 | 23    | 0.306 | 0.12 | 7.42E-09 |
| hsa-miR-122-5p  | 7 | 3     | 2.779 | 0.57 | 7.37E-02 |
| hsa-miR-500a-5p | 7 | 26    | 0.272 | 0.01 | 3.29E-07 |
| hsa-miR-181d    | 7 | 65    | 0.106 | 0.01 | 7.49E-15 |
| hsa-miR-625-5p  | 7 | 16    | 0.433 | 0.22 | 7.08E-05 |
| hsa-miR-190b    | 7 | 7     | 0.956 | 0.55 | 7.87E-01 |
| hsa-miR-628-5p  | 7 | 7     | 1.020 | 0.57 | 8.76E-01 |
| hsa-miR-106a-3p | 7 | 1     | 7.052 | 1.00 | 2.70E-47 |
| hsa-miR-320c    | 6 | 74    | 0.087 | 0.04 | 4.29E-01 |
| hsa-miR-330-3p  | 6 | 30    | 0.213 | 0.01 | 4.18E-12 |
| hsa-miR-1299    | 6 | 26    | 0.246 | 0.28 | 2.55E-02 |
| hsa-miR-486-3p  | 6 | 4     | 1.692 | 0.71 | 1.14E-03 |
| hsa-let-7f-1-3p | 6 | 10    | 0.661 | 0.31 | 5.30E-03 |
| hsa-miR-224-5p  | 6 | 592   | 0.011 | 0.00 | 3.52E-05 |
| hsa-miR-1292-5p | 6 | 5     | 1.166 | 0.63 | 2.22E-01 |
| hsa-miR-877-5p  | 6 | 12    | 0.518 | 0.21 | 5.51E-05 |
| hsa-miR-1287    | 6 | 11    | 0.544 | 0.21 | 4.53E-05 |
| hsa-miR-136-5p  | 6 | 23    | 0.264 | 0.10 | 1.60E-08 |
| hsa-miR-3613-3p | 6 | 4     | 1.616 | 0.79 | 4.20E-04 |
| hsa-miR-7-1-3p  | 6 | 48    | 0.122 | 0.10 | 4.67E-01 |
| hsa-miR-25-5p   | 6 | 13    | 0.452 | 0.20 | 3.65E-05 |
| hsa-miR-548u    | 6 | 2     | 3.457 | 0.95 | 1.03E-20 |
| hsa-miR-133a    | 6 | 472   | 0.012 | 0.00 | 3.23E-03 |
| hsa-miR-1270    | 6 | 19    | 0.292 | 0.84 | 6.79E-01 |
| hsa-miR-1306-3p | 6 | 6     | 1.002 | 0.61 | 9.90E-01 |
| hsa-miR-95      | 5 | 292   | 0.019 | 0.00 | 4.61E-09 |
| hsa-miR-500b    | 5 | 8     | 0.682 | 0.28 | 2.88E-03 |
| hsa-miR-145-3p  | 5 | 972   | 0.006 | 0.00 | 5.00E-08 |
| hsa-miR-548l    | 5 | 2     | 2.559 | 0.94 | 2.39E-17 |
| hsa-miR-4999-5p | 5 | 3     | 1.528 | 0.77 | 2.42E-04 |
| hsa-miR-132-5p  | 5 | 116   | 0.044 | 0.00 | 7.54E-20 |
| hsa-miR-181c-3p | 5 | 33    | 0.155 | 0.00 | 6.58E-10 |
| hsa-miR-301a-5p | 5 | 3     | 1.636 | 0.81 | 1.60E-04 |
| hsa-miR-3940-3p | 5 | 3     | 1.889 | 0.81 | 1.86E-05 |
| hsa-miR-4677-3p | 5 | 5     | 1.052 | 0.56 | 7.09E-01 |
| hsa-miR-375     | 5 | 18612 | 0.000 | 0.00 | 8.07E-05 |
| hsa-miR-30d-3p  | 5 | 8     | 0.602 | 0.31 | 3.96E-03 |
| hsa-miR-2355-3p | 5 | 7     | 0.757 | 0.41 | 1.09E-01 |
| hsa-miR-580     | 5 | 1     | 3.194 | 0.94 | 1.14E-18 |
| hsa-miR-1303    | 5 | 14    | 0.328 | 0.10 | 3.77E-07 |
| hsa-miR-147b    | 4 | 419   | 0.011 | 0.00 | 1.37E-04 |
| hsa-miR-32-3p   | 4 | 5     | 0.867 | 0.53 | 4.03E-01 |
| hsa-miR-411-5p  | 4 | 50    | 0.088 | 0.02 | 1.60E-08 |
| hsa-miR-200a-3p | 4 | 9900  | 0.000 | 0.00 | 1.06E-11 |
| hsa-miR-4454    | 4 | 102   | 0.042 | 0.02 | 1.35E-08 |
| hsa-miR-193a-5p | 4 | 106   | 0.040 | 0.00 | 6.15E-10 |
| hsa-miR-1304-3p | 4 | 11    | 0.382 | 0.16 | 6.37E-06 |
| hsa-miR-889     | 4 | 14    | 0.296 | 0.13 | 2.20E-08 |
| hsa-miR-27a-5p  | 4 | 163   | 0.025 | 0.00 | 1.12E-07 |

|                  |   |      |       |      |          |
|------------------|---|------|-------|------|----------|
| hsa-miR-874      | 4 | 97   | 0.042 | 0.00 | 2.06E-07 |
| hsa-miR-296-5p   | 4 | 7    | 0.532 | 0.24 | 2.49E-04 |
| hsa-miR-618      | 4 | 6    | 0.651 | 0.47 | 1.65E-01 |
| hsa-miR-376c-3p  | 4 | 20   | 0.188 | 0.08 | 6.89E-07 |
| hsa-miR-192-3p   | 4 | 70   | 0.050 | 0.03 | 9.77E-12 |
| hsa-miR-487b     | 3 | 24   | 0.148 | 0.03 | 2.07E-11 |
| hsa-miR-33a-5p   | 3 | 22   | 0.158 | 0.02 | 1.90E-06 |
| hsa-miR-374b-3p  | 3 | 5    | 0.639 | 0.39 | 2.47E-02 |
| hsa-miR-654-5p   | 3 | 14   | 0.243 | 0.07 | 4.71E-06 |
| hsa-miR-493-5p   | 3 | 104  | 0.033 | 0.00 | 5.87E-05 |
| hsa-miR-26a-2-3p | 3 | 15   | 0.231 | 0.07 | 8.19E-10 |
| hsa-miR-99b-3p   | 3 | 74   | 0.044 | 0.00 | 5.43E-13 |
| hsa-miR-3605-3p  | 3 | 8    | 0.416 | 0.18 | 3.11E-05 |
| hsa-miR-431-5p   | 3 | 5    | 0.609 | 0.38 | 3.00E-02 |
| hsa-miR-1249     | 3 | 11   | 0.285 | 0.10 | 2.08E-07 |
| hsa-miR-365b-3p  | 3 | 76   | 0.041 | 0.00 | 3.12E-06 |
| hsa-miR-365a-3p  | 3 | 76   | 0.041 | 0.00 | 3.14E-06 |
| hsa-miR-494      | 3 | 24   | 0.128 | 0.02 | 2.28E-06 |
| hsa-miR-195-5p   | 3 | 227  | 0.013 | 0.00 | 7.49E-08 |
| hsa-miR-143-5p   | 3 | 972  | 0.003 | 0.00 | 4.63E-08 |
| hsa-miR-452-5p   | 3 | 212  | 0.014 | 0.00 | 1.98E-11 |
| hsa-miR-3909     | 3 | 6    | 0.472 | 0.26 | 7.68E-04 |
| hsa-miR-98-3p    | 3 | 5    | 0.567 | 0.32 | 2.03E-02 |
| hsa-miR-31-5p    | 3 | 148  | 0.019 | 0.07 | 1.56E-02 |
| hsa-miR-1271-5p  | 3 | 12   | 0.237 | 0.13 | 7.77E-06 |
| hsa-miR-188-5p   | 3 | 7    | 0.347 | 0.24 | 8.35E-03 |
| hsa-miR-758-3p   | 2 | 9    | 0.266 | 0.15 | 5.76E-03 |
| hsa-miR-1291     | 2 | 36   | 0.069 | 0.00 | 1.62E-05 |
| hsa-miR-1296     | 2 | 49   | 0.049 | 0.00 | 1.22E-21 |
| hsa-miR-652-5p   | 2 | 7    | 0.325 | 0.17 | 3.56E-05 |
| hsa-miR-30a-3p   | 2 | 117  | 0.020 | 0.00 | 4.63E-09 |
| hsa-miR-196a-5p  | 2 | 476  | 0.005 | 0.00 | 4.69E-12 |
| hsa-miR-5701     | 2 | 148  | 0.015 | 0.00 | 1.70E-11 |
| hsa-miR-664b-3p  | 2 | 7    | 0.326 | 0.19 | 1.04E-05 |
| hsa-miR-369-5p   | 2 | 17   | 0.118 | 0.04 | 2.70E-09 |
| hsa-miR-34c-5p   | 2 | 31   | 0.065 | 0.01 | 2.77E-13 |
| hsa-miR-429      | 2 | 2449 | 0.001 | 0.00 | 4.69E-10 |
| hsa-miR-671-5p   | 2 | 44   | 0.044 | 0.00 | 1.08E-07 |
| hsa-miR-127-5p   | 2 | 48   | 0.041 | 0.00 | 3.31E-07 |
| hsa-miR-378f     | 2 | 25   | 0.080 | 0.00 | 2.71E-08 |
| hsa-miR-338-3p   | 2 | 14   | 0.133 | 0.09 | 5.13E-05 |
| hsa-miR-410      | 2 | 8    | 0.242 | 0.13 | 1.35E-06 |
| hsa-miR-502-5p   | 2 | 7    | 0.282 | 0.14 | 3.92E-06 |
| hsa-miR-219-1-3p | 2 | 5    | 0.333 | 0.20 | 6.49E-04 |
| hsa-miR-202-5p   | 2 | 5    | 0.367 | 0.37 | 1.04E-02 |
| hsa-miR-92b-5p   | 2 | 50   | 0.036 | 0.11 | 5.69E-01 |
| hsa-miR-139-3p   | 2 | 14   | 0.120 | 0.08 | 1.68E-05 |
| hsa-miR-141-3p   | 2 | 474  | 0.004 | 0.01 | 9.75E-11 |
| hsa-miR-671-3p   | 2 | 12   | 0.138 | 0.02 | 4.16E-12 |
| hsa-miR-485-5p   | 2 | 28   | 0.056 | 0.01 | 3.47E-05 |
| hsa-miR-4521     | 2 | 19   | 0.082 | 0.10 | 1.69E-04 |
| hsa-miR-34a-5p   | 1 | 373  | 0.004 | 0.00 | 1.18E-12 |
| hsa-miR-30c-1-3p | 1 | 7    | 0.210 | 0.03 | 2.80E-09 |
| hsa-miR-422a     | 1 | 23   | 0.063 | 0.00 | 6.45E-09 |
| hsa-miR-24-1-5p  | 1 | 24   | 0.059 | 0.00 | 6.36E-19 |

|                  |   |      |       |      |          |
|------------------|---|------|-------|------|----------|
| hsa-miR-193a-3p  | 1 | 14   | 0.100 | 0.02 | 1.74E-13 |
| hsa-miR-337-3p   | 1 | 14   | 0.099 | 0.02 | 2.87E-09 |
| hsa-miR-5100     | 1 | 42   | 0.032 | 0.01 | 1.40E-04 |
| hsa-miR-2277-5p  | 1 | 5    | 0.276 | 0.10 | 4.82E-06 |
| hsa-miR-3653     | 1 | 12   | 0.111 | 0.04 | 3.29E-05 |
| hsa-miR-382-3p   | 1 | 16   | 0.083 | 0.03 | 2.13E-08 |
| hsa-miR-409-5p   | 1 | 13   | 0.097 | 0.04 | 8.87E-09 |
| hsa-miR-3934-5p  | 1 | 11   | 0.118 | 0.02 | 3.90E-07 |
| hsa-miR-1290     | 1 | 27   | 0.047 | 0.02 | 5.34E-03 |
| hsa-miR-4792     | 1 | 39   | 0.033 | 0.02 | 2.02E-04 |
| hsa-miR-376a-3p  | 1 | 9    | 0.140 | 0.06 | 5.62E-09 |
| hsa-miR-329      | 1 | 10   | 0.125 | 0.05 | 5.32E-09 |
| hsa-miR-655      | 1 | 10   | 0.124 | 0.04 | 3.53E-08 |
| hsa-miR-543      | 1 | 13   | 0.087 | 0.02 | 7.45E-08 |
| hsa-miR-27b-5p   | 1 | 49   | 0.024 | 0.00 | 2.15E-17 |
| hsa-miR-30b-3p   | 1 | 7    | 0.164 | 0.03 | 1.91E-08 |
| hsa-miR-193b-3p  | 1 | 246  | 0.005 | 0.00 | 2.25E-15 |
| hsa-miR-323a-3p  | 1 | 10   | 0.115 | 0.07 | 7.49E-07 |
| hsa-miR-708-5p   | 1 | 78   | 0.014 | 0.00 | 8.98E-07 |
| hsa-miR-320d     | 1 | 14   | 0.072 | 0.00 | 1.35E-03 |
| hsa-miR-433      | 1 | 11   | 0.091 | 0.02 | 1.93E-09 |
| hsa-miR-200a-5p  | 1 | 1295 | 0.001 | 0.00 | 9.58E-16 |
| hsa-miR-485-3p   | 1 | 6    | 0.157 | 0.07 | 3.54E-07 |
| hsa-miR-769-3p   | 1 | 7    | 0.140 | 0.01 | 8.18E-11 |
| hsa-miR-203a     | 1 | 3007 | 0.000 | 0.00 | 1.05E-07 |
| hsa-miR-323b-3p  | 1 | 5    | 0.185 | 0.12 | 1.33E-04 |
| hsa-miR-377-5p   | 1 | 8    | 0.099 | 0.04 | 4.88E-04 |
| hsa-miR-552      | 1 | 873  | 0.001 | 0.01 | 4.15E-04 |
| hsa-miR-154-5p   | 1 | 11   | 0.073 | 0.03 | 4.17E-09 |
| hsa-miR-1248     | 1 | 94   | 0.009 | 0.00 | 3.05E-10 |
| hsa-miR-5091     | 1 | 10   | 0.079 | 0.01 | 1.36E-10 |
| hsa-miR-4448     | 1 | 9    | 0.084 | 0.01 | 5.58E-09 |
| hsa-miR-191-3p   | 1 | 6    | 0.135 | 0.04 | 2.54E-06 |
| hsa-miR-377-3p   | 1 | 5    | 0.148 | 0.05 | 1.87E-08 |
| hsa-miR-29a-5p   | 1 | 10   | 0.079 | 0.01 | 6.63E-08 |
| hsa-miR-212-5p   | 1 | 13   | 0.058 | 0.00 | 5.86E-12 |
| hsa-miR-3607-3p  | 1 | 54   | 0.014 | 0.00 | 5.32E-07 |
| hsa-miR-514a-3p  | 1 | 6    | 0.131 | 0.22 | 2.30E-01 |
| hsa-miR-194-3p   | 1 | 173  | 0.004 | 0.01 | 3.03E-11 |
| hsa-miR-708-3p   | 1 | 36   | 0.020 | 0.01 | 1.12E-06 |
| hsa-miR-10a-3p   | 1 | 133  | 0.005 | 0.00 | 2.04E-12 |
| hsa-miR-760      | 1 | 5    | 0.125 | 0.08 | 1.53E-04 |
| hsa-miR-23b-5p   | 1 | 17   | 0.037 | 0.00 | 1.04E-15 |
| hsa-miR-504      | 1 | 18   | 0.035 | 0.01 | 3.19E-05 |
| hsa-miR-9-3p     | 1 | 5    | 0.126 | 0.08 | 2.26E-06 |
| hsa-miR-29b-1-5p | 1 | 5    | 0.113 | 0.04 | 2.61E-08 |
| hsa-miR-1275     | 1 | 24   | 0.024 | 0.00 | 1.81E-04 |
| hsa-miR-1268b    | 1 | 16   | 0.035 | 0.00 | 5.47E-05 |
| hsa-miR-509-3-5p | 1 | 7    | 0.080 | 0.08 | 7.94E-02 |
| hsa-miR-204-5p   | 1 | 20   | 0.027 | 0.02 | 2.91E-05 |
| hsa-miR-656      | 1 | 6    | 0.082 | 0.03 | 1.22E-07 |
| hsa-miR-125a-3p  | 1 | 6    | 0.083 | 0.01 | 2.07E-09 |
| hsa-miR-497-5p   | 0 | 64   | 0.008 | 0.00 | 1.27E-09 |
| hsa-miR-92a-1-5p | 0 | 9    | 0.054 | 0.01 | 3.54E-07 |
| hsa-miR-31-3p    | 0 | 18   | 0.027 | 0.06 | 2.30E-03 |



|                   |   |     |       |      |          |
|-------------------|---|-----|-------|------|----------|
| hsa-miR-455-5p    | 0 | 302 | 0.002 | 0.00 | 7.72E-12 |
| hsa-miR-4664-3p   | 0 | 9   | 0.056 | 0.04 | 1.64E-05 |
| hsa-miR-1268a     | 0 | 15  | 0.030 | 0.00 | 3.42E-05 |
| hsa-miR-1262      | 0 | 5   | 0.098 | 0.05 | 4.34E-02 |
| hsa-miR-490-3p    | 0 | 17  | 0.026 | 0.07 | 1.04E-01 |
| hsa-miR-6724-5p   | 0 | 6   | 0.062 | 0.01 | 1.21E-04 |
| hsa-miR-940       | 0 | 5   | 0.082 | 0.01 | 3.65E-08 |
| hsa-miR-212-3p    | 0 | 8   | 0.046 | 0.00 | 7.12E-10 |
| hsa-let-7e-3p     | 0 | 10  | 0.036 | 0.00 | 9.01E-08 |
| hsa-miR-509-3p    | 0 | 6   | 0.066 | 0.06 | 9.67E-02 |
| hsa-miR-299-5p    | 0 | 8   | 0.045 | 0.01 | 2.87E-07 |
| hsa-miR-135b-5p   | 0 | 317 | 0.001 | 0.00 | 3.12E-05 |
| hsa-miR-3651      | 0 | 7   | 0.050 | 0.01 | 4.89E-05 |
| hsa-miR-299-3p    | 0 | 5   | 0.069 | 0.01 | 3.33E-10 |
| hsa-miR-4485      | 0 | 7   | 0.045 | 0.03 | 2.77E-02 |
| hsa-miR-4488      | 0 | 6   | 0.057 | 0.03 | 2.03E-02 |
| hsa-miR-296-3p    | 0 | 6   | 0.049 | 0.00 | 1.86E-05 |
| hsa-miR-129-2-3p  | 0 | 11  | 0.028 | 0.02 | 2.39E-01 |
| hsa-miR-195-3p    | 0 | 45  | 0.007 | 0.00 | 4.88E-08 |
| hsa-miR-125b-2-3p | 0 | 34  | 0.009 | 0.00 | 1.93E-04 |
| hsa-miR-125b-1-3p | 0 | 18  | 0.018 | 0.00 | 4.18E-07 |
| hsa-miR-508-3p    | 0 | 6   | 0.050 | 0.04 | 1.26E-01 |
| hsa-miR-141-5p    | 0 | 53  | 0.006 | 0.01 | 4.60E-07 |
| hsa-miR-200b-5p   | 0 | 213 | 0.001 | 0.00 | 2.53E-14 |
| hsa-miR-511       | 0 | 19  | 0.015 | 0.00 | 6.15E-12 |
| hsa-miR-129-5p    | 0 | 22  | 0.013 | 0.00 | 6.84E-02 |
| hsa-miR-133b      | 0 | 16  | 0.018 | 0.00 | 2.89E-03 |
| hsa-miR-214-3p    | 0 | 251 | 0.001 | 0.00 | 1.86E-06 |
| hsa-miR-217       | 0 | 9   | 0.033 | 0.00 | 8.36E-06 |
| hsa-miR-203b-3p   | 0 | 38  | 0.007 | 0.00 | 1.86E-06 |
| hsa-miR-138-5p    | 0 | 14  | 0.020 | 0.00 | 1.90E-08 |
| hsa-miR-30c-2-3p  | 0 | 32  | 0.008 | 0.00 | 2.39E-10 |
| hsa-miR-99a-3p    | 0 | 8   | 0.032 | 0.00 | 5.03E-05 |
| hsa-miR-149-5p    | 0 | 53  | 0.005 | 0.00 | 5.20E-11 |
| hsa-miR-577       | 0 | 17  | 0.015 | 0.00 | 7.71E-08 |
| hsa-miR-483-3p    | 0 | 16  | 0.015 | 0.01 | 3.38E-01 |
| hsa-miR-193b-5p   | 0 | 12  | 0.020 | 0.00 | 1.33E-07 |
| hsa-miR-224-3p    | 0 | 8   | 0.028 | 0.00 | 4.03E-08 |
| hsa-miR-365a-5p   | 0 | 16  | 0.015 | 0.00 | 1.21E-11 |
| hsa-miR-206       | 0 | 6   | 0.040 | 0.00 | 3.40E-04 |
| hsa-miR-483-5p    | 0 | 10  | 0.022 | 0.00 | 3.09E-01 |
| hsa-miR-935       | 0 | 11  | 0.019 | 0.00 | 5.18E-01 |
| hsa-miR-592       | 0 | 40  | 0.005 | 0.00 | 7.49E-04 |
| hsa-miR-4449      | 0 | 7   | 0.031 | 0.00 | 1.04E-04 |
| hsa-miR-455-3p    | 0 | 77  | 0.003 | 0.00 | 5.02E-13 |
| hsa-miR-3131      | 0 | 10  | 0.020 | 0.00 | 4.04E-05 |
| hsa-miR-549a      | 0 | 8   | 0.025 | 0.00 | 1.74E-05 |
| hsa-miR-214-5p    | 0 | 112 | 0.002 | 0.00 | 5.74E-07 |
| hsa-miR-200c-5p   | 0 | 11  | 0.017 | 0.00 | 9.75E-11 |
| hsa-miR-135b-3p   | 0 | 16  | 0.011 | 0.00 | 2.18E-05 |
| hsa-miR-3610      | 0 | 9   | 0.020 | 0.00 | 5.83E-01 |
| hsa-miR-615-3p    | 0 | 12  | 0.015 | 0.00 | 1.05E-02 |
| hsa-miR-147a      | 0 | 5   | 0.034 | 0.00 | 2.43E-04 |
| hsa-miR-1247-5p   | 0 | 27  | 0.006 | 0.00 | 8.84E-03 |
| hsa-miR-1247-3p   | 0 | 14  | 0.012 | 0.00 | 1.27E-02 |

|                 |   |    |       |      |          |
|-----------------|---|----|-------|------|----------|
| hsa-miR-585     | 0 | 10 | 0.017 | 0.00 | 5.65E-05 |
| hsa-miR-10b-3p  | 0 | 17 | 0.010 | 0.00 | 1.06E-13 |
| hsa-miR-1269a   | 0 | 5  | 0.035 | 0.00 | 4.31E-02 |
| hsa-miR-653     | 0 | 5  | 0.033 | 0.00 | 7.87E-03 |
| hsa-miR-1911-5p | 0 | 25 | 0.007 | 0.00 | 6.02E-01 |
| hsa-miR-887     | 0 | 21 | 0.008 | 0.00 | 2.64E-06 |
| hsa-miR-5571-3p | 0 | 10 | 0.017 | 0.00 | 2.12E-05 |
| hsa-miR-4684-3p | 0 | 9  | 0.019 | 0.00 | 3.36E-07 |
| hsa-miR-4532    | 0 | 7  | 0.025 | 0.00 | 4.25E-05 |

# Supplemental Figure 1

**A**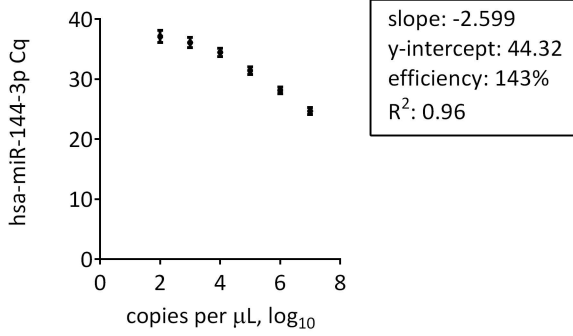**B**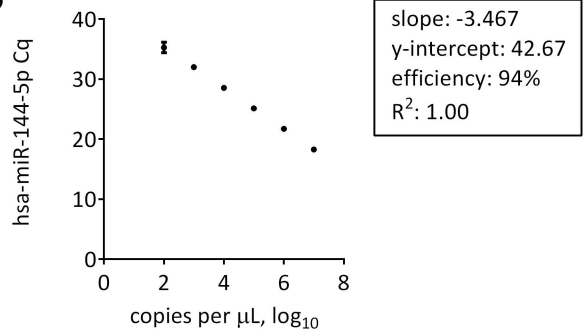**C**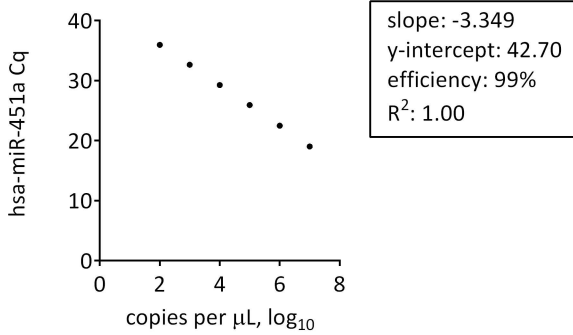**D**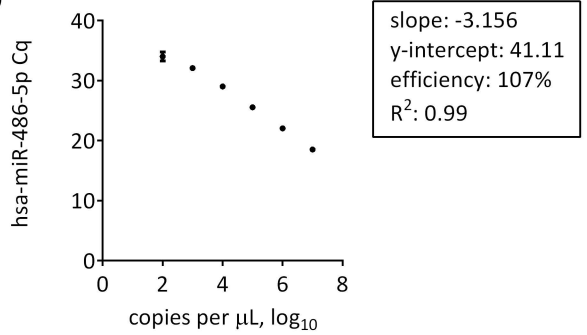**E**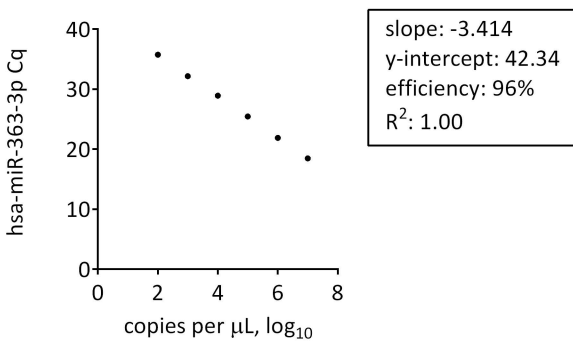**F**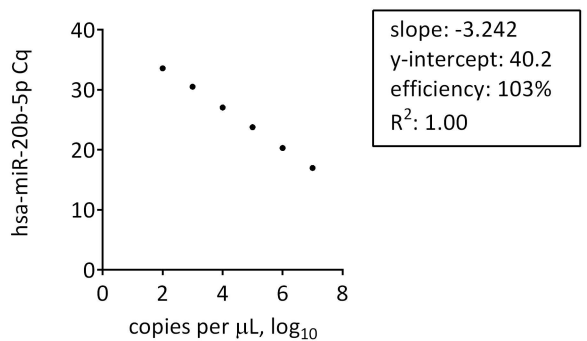**G**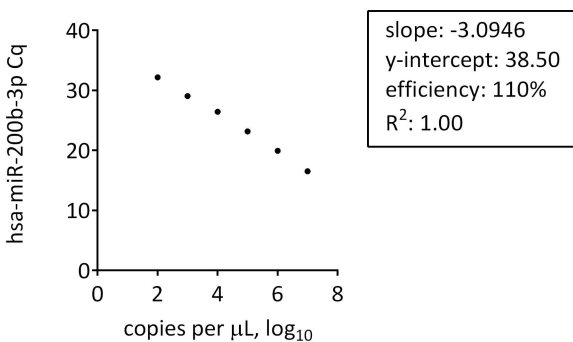**H**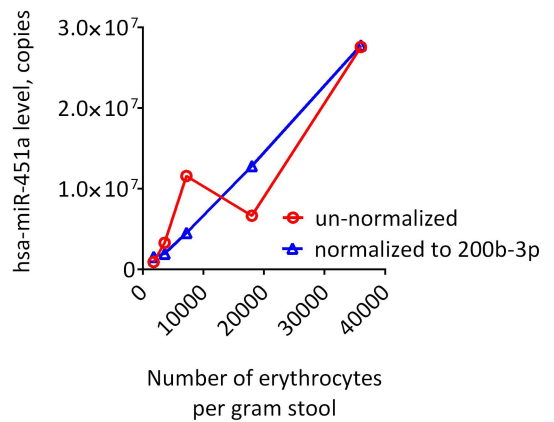

**Supplemental Figure 1. Evaluation of calibration curves for erythrocyte miRNA markers by hydrolysis probes based miRNA RT-qPCR assays.**

Calibration curves generated by synthetic RNA oligos of **(a)** hsa-miR-144-3p, **(b)** hsa-miR-144-5p, **(c)** hsa-miR-451a, **(d)** hsa-miR-486-5p, **(e)** hsa-miR-363, **(f)** hsa-miR-20b-5p, and **(g)** hsa-miR-200b-3p at  $10^7$ ,  $10^6$ ,  $10^5$ ,  $10^4$ ,  $10^3$ , and  $10^2$  copies were used to investigate assay efficiencies. Box insert indicates slope and intercept of the calibration curve, PCR efficiency estimated from the slope, and  $R^2$  of the calibration curve. Data points represent mean  $\pm$  s.d. of triplicate technical replicates. Assay for hsa-miR-144-3p demonstrated suboptimal differentiation towards low copies. All other assays showed linear range between  $10^2$  copies to  $10^7$  copies. All no-template controls showed no signal amplifications. **(h)** Detection of hsa-miR-451a in stool spiked with blood at concentrations of 1800, 3600, 7200, 18000, and 36000 erythrocytes per gram of stool. Normalization of the erythrocyte marker to hsa-miR-200b-3p was able to correct for variations in input RNA amount and qRT-PCR efficiency.

**Supplemental Table 1. Patient characteristics of samples for marker discovery by small RNA sequencing**

|                                          | Normal whole blood | Colorectal epithelial tissue <sup>a</sup> |                               |         | CRC     |
|------------------------------------------|--------------------|-------------------------------------------|-------------------------------|---------|---------|
|                                          |                    | Normal Colon                              | Advanced adenoma <sup>c</sup> |         |         |
|                                          |                    |                                           | Adenoma                       | SSA     |         |
| <b>No. of cases</b>                      | 25                 | 20                                        | 26                            | 14      | 35      |
| <b>Age</b>                               |                    |                                           |                               |         |         |
| <b>Mean±SD</b>                           | 63±9               | 62±5                                      | 62±11                         | 63±13   | 59±10   |
| <b>Gender, number (%)</b>                |                    |                                           |                               |         |         |
| <b>Female</b>                            | 13 (52)            | 9 (40)                                    | 13 (50)                       | 8 (57)  | 17 (49) |
| <b>Location <sup>b</sup>, number (%)</b> |                    |                                           |                               |         |         |
| <b>Proximal</b>                          |                    |                                           | 13 (50)                       | 12 (86) | 17 (49) |
| <b>Distal</b>                            |                    |                                           | 13 (50)                       | 2 (14)  | 18 (51) |
| <b>TMN stage, number (%)</b>             |                    |                                           |                               |         |         |
| <b>I</b>                                 |                    |                                           |                               |         | 6 (17)  |
| <b>II</b>                                |                    |                                           |                               |         | 10 (29) |
| <b>III</b>                               |                    |                                           |                               |         | 15 (43) |
| <b>IV</b>                                |                    |                                           |                               |         | 4 (11)  |

<sup>a</sup> In technical validation by RT-qPCR, all whole blood samples (n = 25) and a randomly selected subset in each group (5 normal colon, 5 adenoma, 5 SSA, and 5 CRC) were included.

<sup>b</sup> Proximal lesions include tumors at or proximal to the splenic flexure, and distal lesions are those distal to the splenic flexure.

<sup>c</sup> Advanced adenoma includes 1) adenoma measuring ≥1 cm in the greatest dimension, with high-grade dysplasia, or with ≥ 25% villous histologic features, and 2) Sessile serrated adenoma (SSA) ≥1cm.

**Supplemental Table 2. Candidate miRNA markers: sequences, miRBase accession number and RT-qPCR assay information**

| miRNA name      | Sequence (5' to 3')      | Length (no. of bases) | miRBase Accession Number | Vendor's Assay Number                           |                                              |
|-----------------|--------------------------|-----------------------|--------------------------|-------------------------------------------------|----------------------------------------------|
|                 |                          |                       |                          | Locked nucleic acid assay (Exiqon) <sup>a</sup> | Hydrolysis probe assay (TaqMan) <sup>b</sup> |
| hsa-miR-144-3p  | UACAGUAUAGAUGAUGUACU     | 20                    | MIMAT0000436             | 204754                                          | 002676                                       |
| hsa-miR-144-5p  | GGAUAUCAUCAUAUACUGUAAG   | 22                    | MIMAT0004600             | 204670                                          | 002148                                       |
| hsa-miR-486-5p  | UCCUGUACUGAGCUGCCCCGAG   | 22                    | MIMAT0002177             | 204001                                          | 001278                                       |
| hsa-miR-451a    | AAACCGUUACCAUUACUGAGUU   | 22                    | MIMAT0001631             | 204734                                          | 001141                                       |
| hsa-miR-363-3p  | AAUUGCACGGUAUCCAUCUGUA   | 22                    | MIMAT0000707             | 204726                                          | 001271                                       |
| hsa-miR-20b-5p  | CAAAGUGCUCUAUAGUGCAGGUAG | 23                    | MIMAT0001413             | 204755                                          | 001014                                       |
| hsa-miR-106a-5p | AAAAGUGC UUACAGUGCAGGUAG | 23                    | MIMAT0000103             | 204563                                          |                                              |
| hsa-miR-32-5p   | UAUUGCACAUAUAAGUUGCA     | 22                    | MIMAT0000090             | 204792                                          |                                              |
| hsa-miR-185-5p  | UGGAGAGAAAGGCAGUUCUGA    | 22                    | MIMAT0000455             | 206037                                          |                                              |
| hsa-miR-101-3p  | UACAGUACUGUGAUAAACUGAA   | 21                    | MIMAT0000099             | 204786                                          |                                              |
| hsa-miR-15b-5p  | UAGCAGCACAUCAUGGUUUACA   | 22                    | MIMAT0000417             | 204243                                          |                                              |
| hsa-miR-142-5p  | CAUAAAGUAGAAAGCACUACU    | 21                    | MIMAT0000433             | 204722                                          |                                              |
| hsa-miR-16-5p   | UAGCAGCACGUAAAUAUUGGCG   | 22                    | MIMAT0000069             | 205702                                          |                                              |
| hsa-miR-15a-5p  | UAGCAGCACAUAAUGGUUUGUG   | 22                    | MIMAT0000068             | 204066                                          |                                              |
| hsa-miR-15b-3p  | CGAAUCAUUAUUUGCUGCUCUA   | 22                    | MIMAT0004586             | 205898                                          |                                              |
| hsa-miR-200a-5p | CAUCUUACCGGACAGUGCUGGA   | 22                    | MIMAT0001620             | 206063                                          |                                              |
| hsa-miR-200b-3p | UAAUACUGCCUGGUAAUGAUGA   | 22                    | MIMAT0000318             | 206071                                          | 002251                                       |
| hsa-miR-200a-3p | UAACACUGUCUGGUAAACGAUGU  | 22                    | MIMAT0000682             | 204707                                          |                                              |
| hsa-miR-203a    | GUGAAAUGUUUAGGACCACUAG   | 22                    | MIMAT0000264             | 205914                                          |                                              |
| hsa-miR-375     | UUUGUUCGUUCGGCUCGCGUGA   | 22                    | MIMAT0000728             | 204362                                          |                                              |
| hsa-miR-30e-3p  | CUUUCAGUCGGAUGUUUACAGC   | 22                    | MIMAT0000693             | 204410                                          |                                              |
| cel-miR-39-3p   | UCACCGGGUGUAAAUCAGCUUG   | 22                    | MIMAT0000010             |                                                 | 000200                                       |

<sup>a</sup> For technical validation of sequencing data

<sup>b</sup> For quantification of miRNA markers in stool. RT-qPCR efficiency of each assay was evaluated as shown in Supplementary Figure 1

**Supplemental Table 3. Patient characteristics of *exploratory set* samples**

|                                               | Normal  | CRC     | Pancreatic cancer |
|-----------------------------------------------|---------|---------|-------------------|
| <b>No. of cases</b>                           | 20      | 20      | 20                |
| <b>Age</b>                                    |         |         |                   |
| <b>Mean ± SD</b>                              | 71.2±9  | 63.4±14 | 62.8±10           |
| <b>Gender, number (%)</b>                     |         |         |                   |
| <b>Female</b>                                 | 10 (50) | 10 (50) | 8 (40)            |
| <b>CRC Location, number (%)</b>               |         |         |                   |
| <b>Proximal</b>                               |         | 10 (50) |                   |
| <b>Distal</b>                                 |         | 10 (50) |                   |
| <b>Pancreatic cancer location, number (%)</b> |         |         |                   |
| <b>Head</b>                                   |         |         | 11 (55)           |
| <b>Body</b>                                   |         |         | 4 (20)            |
| <b>Tail</b>                                   |         |         | 5 (25)            |
| <b>TMN stage, number (%)</b>                  |         |         |                   |
| <b>I</b>                                      |         | 5 (25)  | 0 (0)             |
| <b>II</b>                                     |         | 7 (35)  | 0 (0)             |
| <b>III</b>                                    |         | 8 (40)  | 10 (50)           |
| <b>IV</b>                                     |         | 0 (0)   | 10 (50)           |

**Supplemental Table 4. Patient characteristics of *feasibility set* samples**

|                                          | Normal Colon | Advanced Adenoma <sup>a</sup> | CRC     |
|------------------------------------------|--------------|-------------------------------|---------|
| <b>No. of cases</b>                      | 115          | 31                            | 29      |
| <b>Age</b>                               |              |                               |         |
| <b>Mean ± SD</b>                         | 66.2±9       | 65.4±9                        | 61.2±13 |
| <b>Gender, number (%)</b>                |              |                               |         |
| <b>Female</b>                            | 60 (52)      | 10 (32)                       | 15 (52) |
| <b>Location, number (%)</b>              |              |                               |         |
| <b>Proximal</b>                          |              | 23 (74)                       | 16 (55) |
| <b>Distal</b>                            |              | 8 (26)                        | 13 (45) |
| <b>Adenoma histology</b>                 |              |                               |         |
| <b>Tubular</b>                           |              | 20                            |         |
| <b>Tubulovillous</b>                     |              | 7                             |         |
| <b>SSA</b>                               |              | 4                             |         |
| <b>TMN stage<sup>a</sup>, number (%)</b> |              |                               |         |
| <b>I</b>                                 |              |                               | 6 (21)  |
| <b>II</b>                                |              |                               | 10 (34) |
| <b>III</b>                               |              |                               | 9 (31)  |
| <b>IV</b>                                |              |                               | 1 (3)   |

<sup>a</sup> Advanced adenoma includes adenoma measuring ≥1 cm in the greatest dimension, with high-grade dysplasia, or with ≥ 25% villous histologic features, and sessile serrated adenoma (SSA)

<sup>b</sup> TNM stage data of three patients were unavailable.



**Supplemental Table 5. Erythrocyte markers level in blood from dietary animals relative to human blood**

|         | hsa-miR-144-3p | hsa-miR-451a-5p | hsa-miR-144-5p | hsa-miR-20b-5p | hsa-miR-486-5p | hsa-miR-363-3p |
|---------|----------------|-----------------|----------------|----------------|----------------|----------------|
| Human   | <b>1.00</b>    | <b>1.00</b>     | <b>1.00</b>    | <b>1.00</b>    | <b>1.00</b>    | <b>1.00</b>    |
| Pig     | 0.80           | 1.06            | 0.67           | 0.00           | 0.29           | 0.01           |
| Bovine  | 0.15           | 0.17            | 0.16           | 0.00           | 0.42           | 0.00           |
| Sheep   | 0.21           | 0.62            | 0.15           | 0.00           | 1.17           | 0.00           |
| Rabbit  | 0.34           | 0.19            | 0.18           | 0.00           | 0.07           | 0.00           |
| Chicken | 0.11           | 0.17            | 0.05           | 0.32           | 0.00           | 0.47           |
| Turkey  | 0.17           | 0.12            | 0.04           | 0.15           | 0.00           | 0.32           |

**Stool hsa-miR-451a levels and FIT results in *pilot set*<sup>a</sup>**

| Sample # | Pathology         | Stage | Cancer Site | hsa-miR-451a, copies per $\mu$ L stool homogenate | hemoglobin, ng per mL collection buffer |
|----------|-------------------|-------|-------------|---------------------------------------------------|-----------------------------------------|
| 36       | CRC               | III   | Proximal    | 0                                                 | 52.71                                   |
| 16       | CRC               | III   | Proximal    | 0                                                 | 166.41                                  |
| 21       | CRC               | I     | Proximal    | 365                                               | 598.77                                  |
| 56       | CRC               | II    | Proximal    | 647                                               | 598.77                                  |
| 17       | CRC               | I     | Proximal    | 920                                               | 21.25                                   |
| 41       | CRC               | III   | Proximal    | 2504                                              | 381.17                                  |
| 49       | CRC               | II    | Proximal    | 3635                                              | 425.33                                  |
| 48       | CRC               | III   | Proximal    | 12000                                             | 598.77                                  |
| 10       | CRC               | III   | Proximal    | 14864                                             | 598.77                                  |
| 26       | CRC               | II    | Proximal    | 39073                                             | 598.77                                  |
| 34       | CRC               | II    | Distal      | 0                                                 | 598.77                                  |
| 24       | CRC               | I     | Distal      | 505                                               | 15.82                                   |
| 22       | CRC               | I     | Distal      | 505                                               | 24.57                                   |
| 43       | CRC               | II    | Distal      | 774                                               | 598.77                                  |
| 51       | CRC               | II    | Distal      | 3895                                              | 598.77                                  |
| 57       | CRC               | II    | Distal      | 30899                                             | 598.77                                  |
| 28       | CRC               | I     | Distal      | 34270                                             | 118.20                                  |
| 30       | CRC               | III   | Distal      | 54424                                             | 231.23                                  |
| 54       | CRC               | III   | Distal      | 56335                                             | 598.77                                  |
| 33       | CRC               | III   | Distal      | 68348                                             | 598.77                                  |
| 39       | Healthy control   |       |             | 0                                                 | 4.23                                    |
| 45       | Healthy control   |       |             | 0                                                 | 5.66                                    |
| 32       | Healthy control   |       |             | 0                                                 | 6.37                                    |
| 35       | Healthy control   |       |             | 0                                                 | 8.37                                    |
| 20       | Healthy control   |       |             | 0                                                 | 17.86                                   |
| 13       | Healthy control   |       |             | 0                                                 | 18.10                                   |
| 25       | Healthy control   |       |             | 0                                                 | 19.18                                   |
| 15       | Healthy control   |       |             | 0                                                 | 17.98                                   |
| 44       | Healthy control   |       |             | 0                                                 | 4.71                                    |
| 1        | Healthy control   |       |             | 1                                                 | N/A                                     |
| 42       | Healthy control   |       |             | 7                                                 | 5.42                                    |
| 18       | Healthy control   |       |             | 15                                                | 13.68                                   |
| 3        | Healthy control   |       |             | 54                                                | N/A                                     |
| 59       | Healthy control   |       |             | 285                                               | 20.64                                   |
| 12       | Healthy control   |       |             | 299                                               | 8.73                                    |
| 31       | Healthy control   |       |             | 331                                               | 71.10                                   |
| 19       | Healthy control   |       |             | 362                                               | 3.87                                    |
| 7        | Healthy control   |       |             | 471                                               | N/A                                     |
| 4        | Healthy control   |       |             | 689                                               | N/A                                     |
| 5        | Healthy control   |       |             | 1345                                              | N/A                                     |
| 29       | Pancreatic cancer | III   | Body        | 0                                                 | N/A                                     |
| 47       | Pancreatic cancer | III   | Body        | 0                                                 | N/A                                     |
| 37       | Pancreatic cancer | IV    | Body        | 0                                                 | N/A                                     |
| 38       | Pancreatic cancer | IV    | Body        | 0                                                 | N/A                                     |
| 8        | Pancreatic cancer | III   | Head        | 0                                                 | N/A                                     |

|    |                   |     |      |      |     |
|----|-------------------|-----|------|------|-----|
| 23 | Pancreatic cancer | III | Head | 0    | N/A |
| 60 | Pancreatic cancer | IV  | Head | 0    | N/A |
| 6  | Pancreatic cancer | III | Tail | 0    | N/A |
| 52 | Pancreatic cancer | III | Tail | 0    | N/A |
| 46 | Pancreatic cancer | IV  | Tail | 0    | N/A |
| 50 | Pancreatic cancer | IV  | Tail | 0    | N/A |
| 27 | Pancreatic cancer | III | Head | 0    | N/A |
| 53 | Pancreatic cancer | IV  | Head | 4    | N/A |
| 40 | Pancreatic cancer | III | Head | 5    | N/A |
| 55 | Pancreatic cancer | IV  | Head | 258  | N/A |
| 2  | Pancreatic cancer | III | Head | 324  | N/A |
| 11 | Pancreatic cancer | III | Head | 383  | N/A |
| 58 | Pancreatic cancer | IV  | Head | 446  | N/A |
| 9  | Pancreatic cancer | IV  | Head | 1336 | N/A |
| 14 | Pancreatic cancer | IV  | Tail | 1513 | N/A |

<sup>a</sup> Modeling of markers was not performed in this cohort due to sample size limitation. hsa-miR-451a alone yielded an AUC of 0.86 (95% CI, 0.74-0.98,  $P < .0001$ ) to discriminate CRC cases (n=20) from controls (n=40); FIT data were available to all 20 CRC cases and 15 healthy controls. In this subset, at 100% specificity, FIT detected 80% and hsa-miR-451a detected 85% of CRCs.
